# Supplementary material for: GPCRs show widespread differential mRNA expression and frequent mutation and copy number variation in solid tumors
Source: PubMed Central journal article supplement (PMC6901242; doi:10.1371/journal.pbio.3000434), 2019-11-25

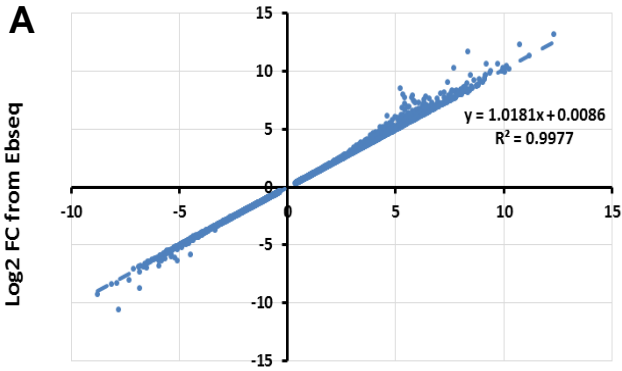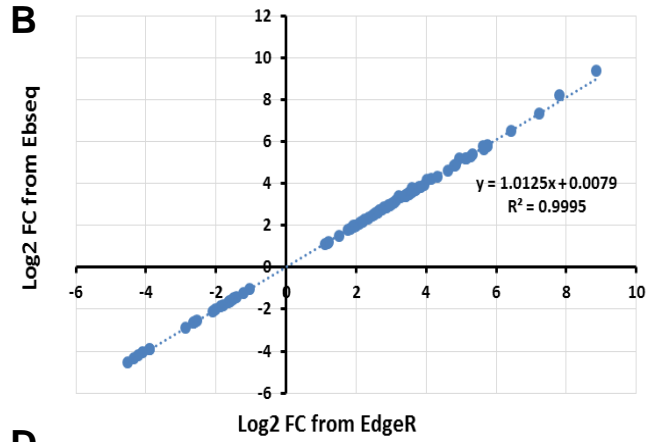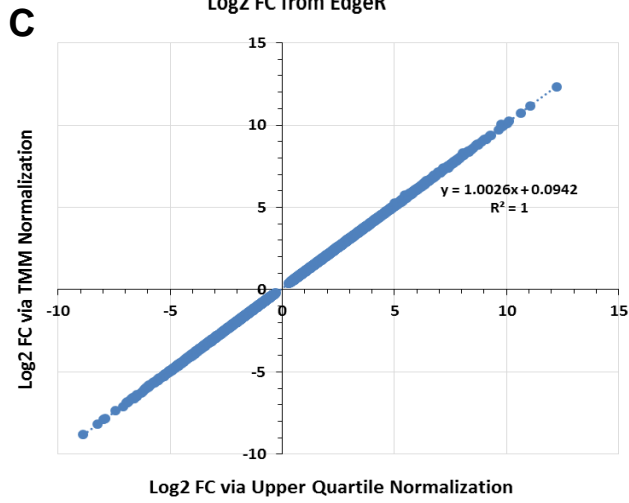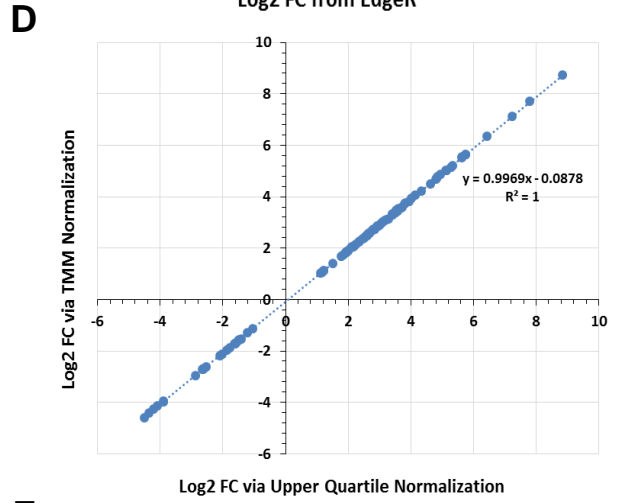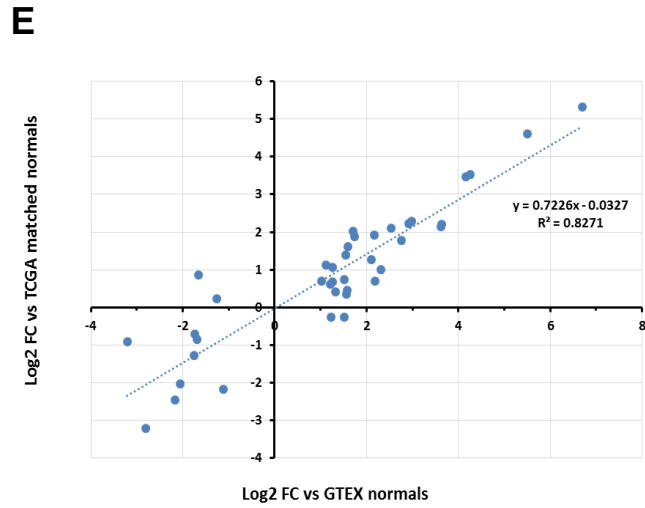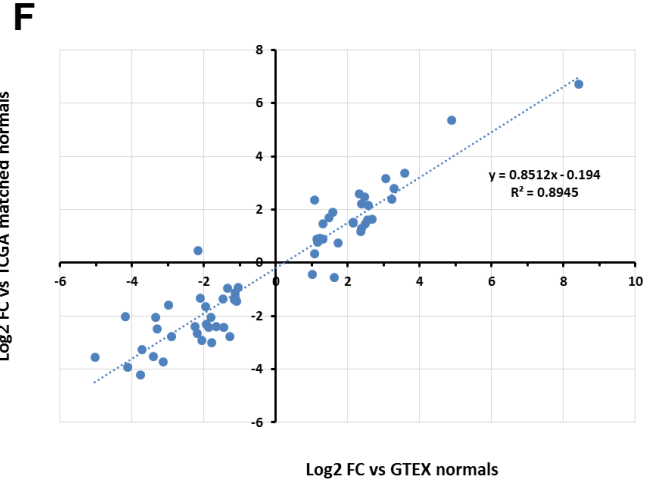

Supplement: pbio.3000434.s012.pdf [file pbio.3000434.s012.pdf]
