# Supplementary material for: GPCRs show widespread differential mRNA expression and frequent mutation and copy number variation in solid tumors
Source: PLOS journal article supplement (doi:10.1371/journal.pbio.3000434), 2019-11-25
Supplement: S2 (10.1371/journal.pbio.3000434.s002) [file journal.pbio.3000434.s002]

**GPCRs which frequently show reduced expression in tumors**

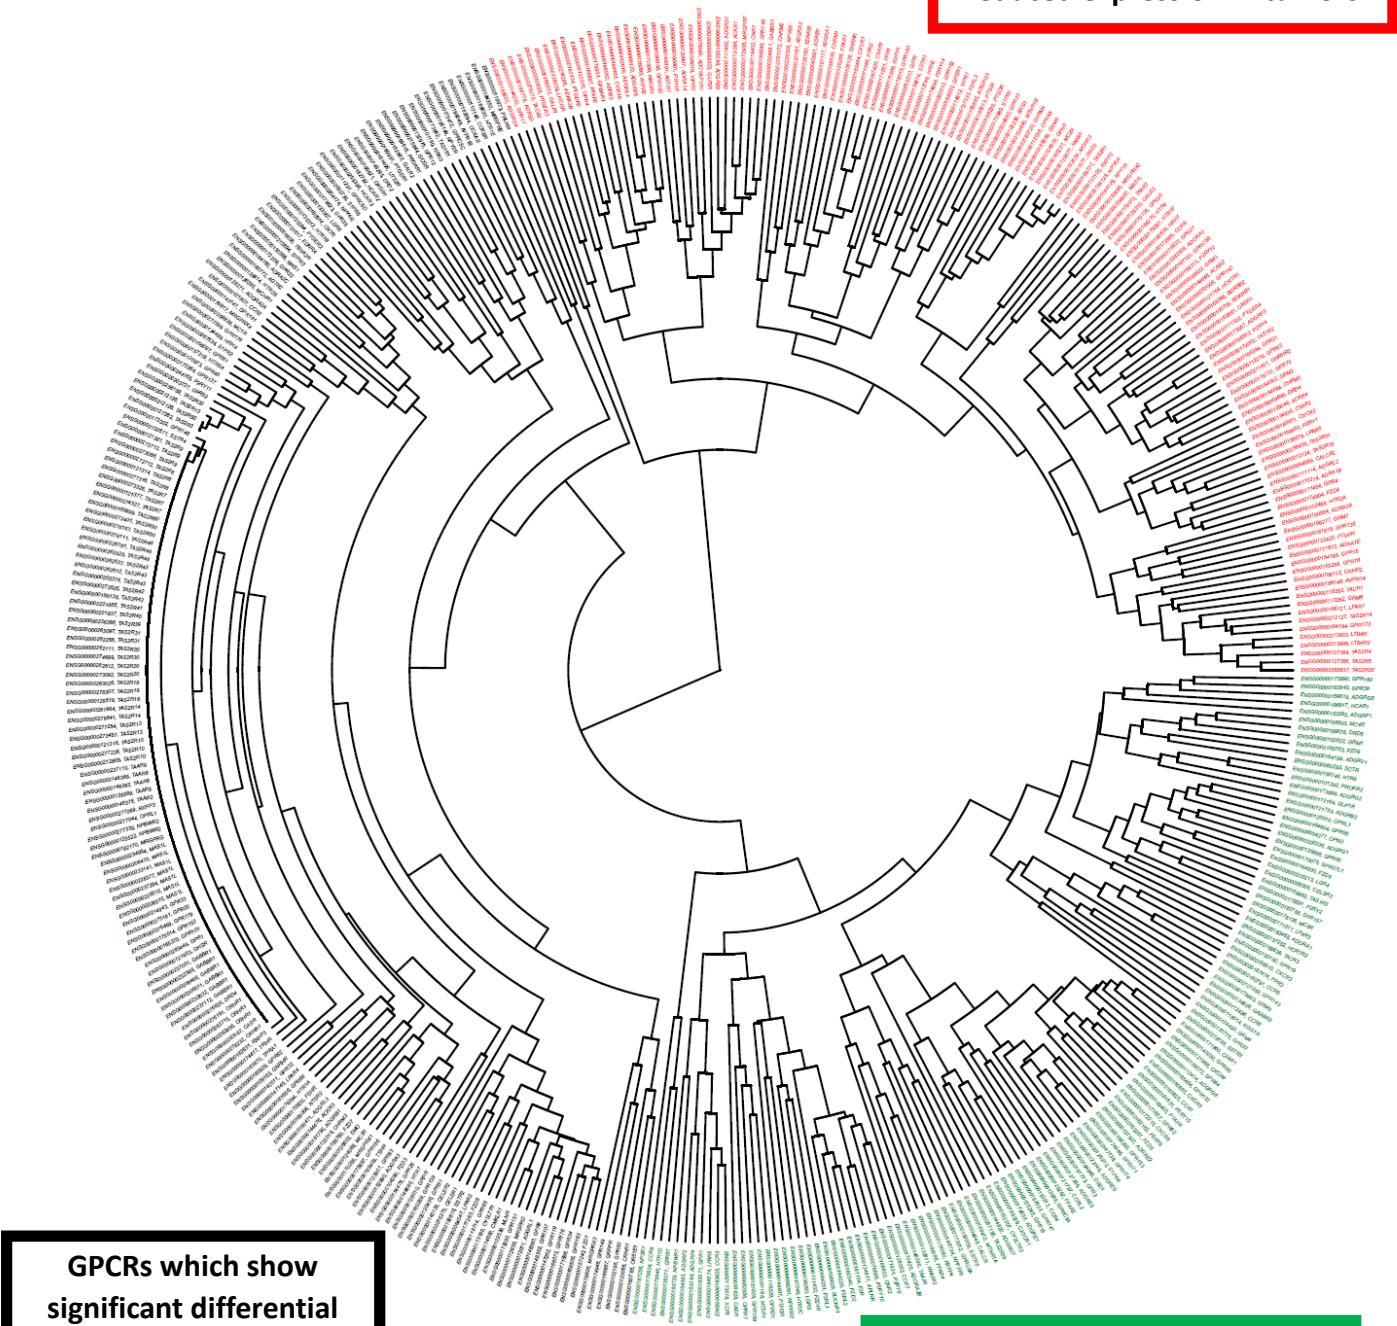

**GPCRs which show significant differential expression infrequently**

**GPCRs with increased expression in multiple tumor types**
